# Supplementary material for: Thermally Remendable Polyurethane Network Cross-Linked via Reversible Diels–Alder Reaction
Source: MDPI journal article supplement (doi:10.3390/polym13121935), 2021-06-10
Supplement: s1 [file s1]

# Supplementary material: Thermally Remendable Polyurethane Network Cross-Linked via Reversible Diels-Alder Reaction

Elena Platonova, Islam Chechenov, Alexander Pavlov, Vitaliy Solodilov, Egor Afanas'ev, Alexey Shapagin, and Alexander Polezhaev

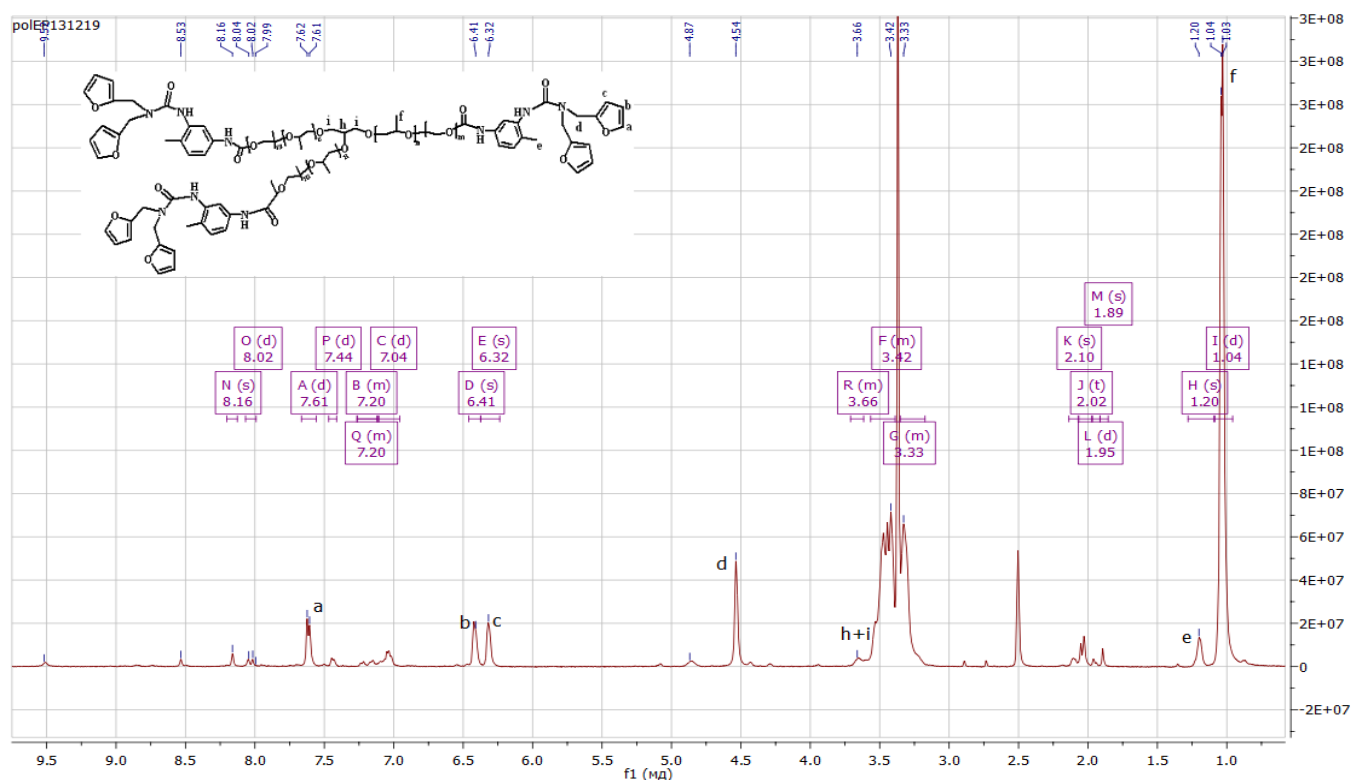

Figure S1.  $^1\text{H}$  NMR spectrum of PU-V0 in  $\text{DMSO-d}_6$ .

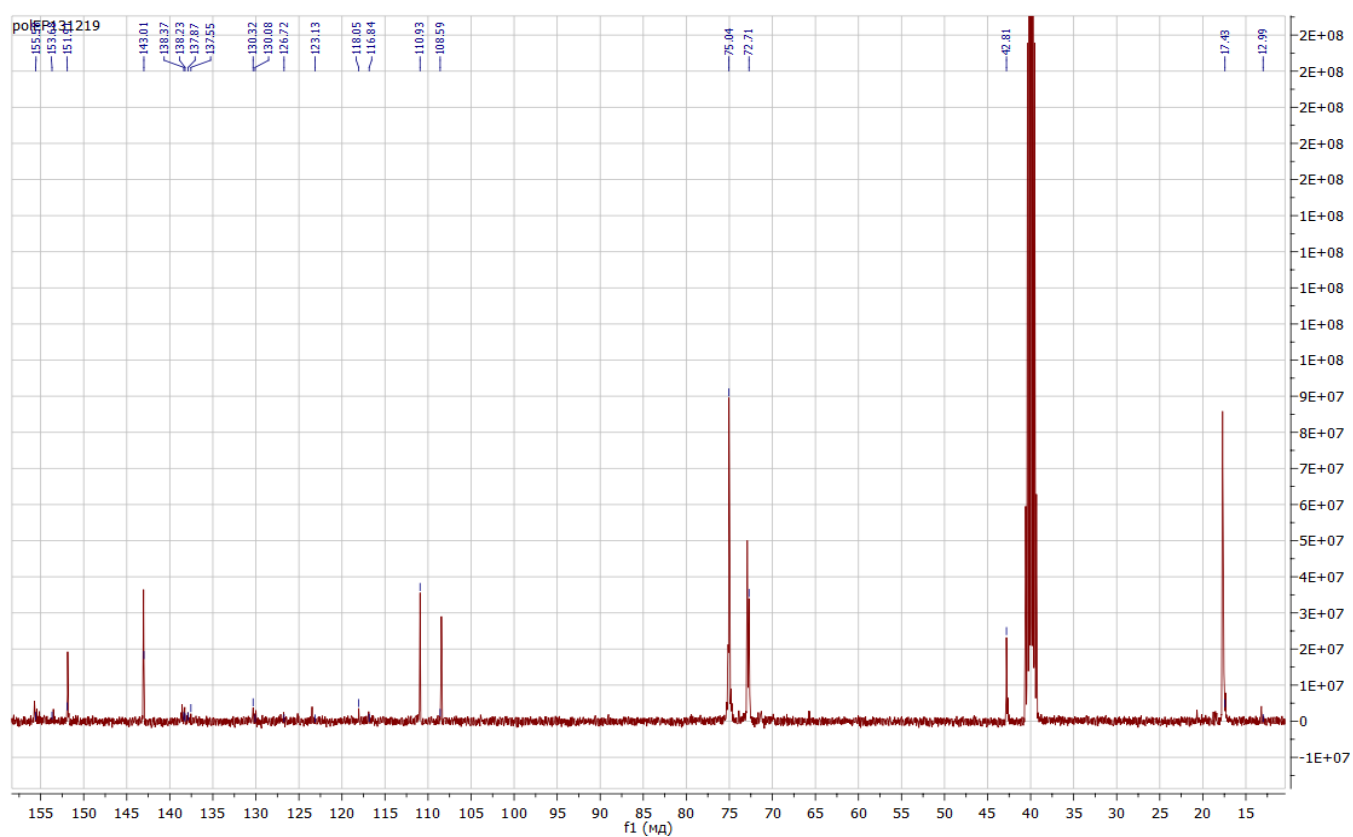Figure S2.  $^{13}\text{C}$  NMR spectrum of PU-V0 in  $\text{DMSO-d}_6$ .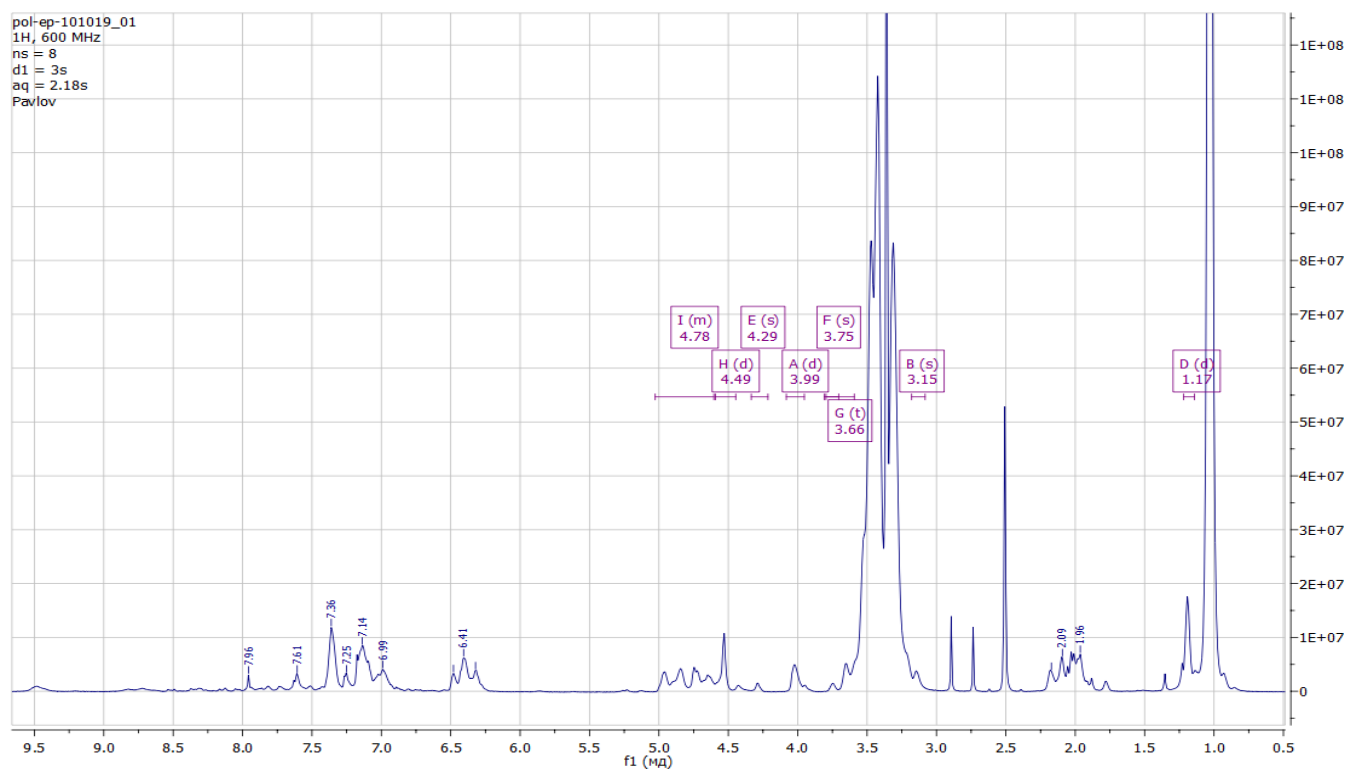Figure S3.  $^1\text{H}$  NMR spectrum of PU-V1.0 in  $\text{DMSO-d}_6$ .

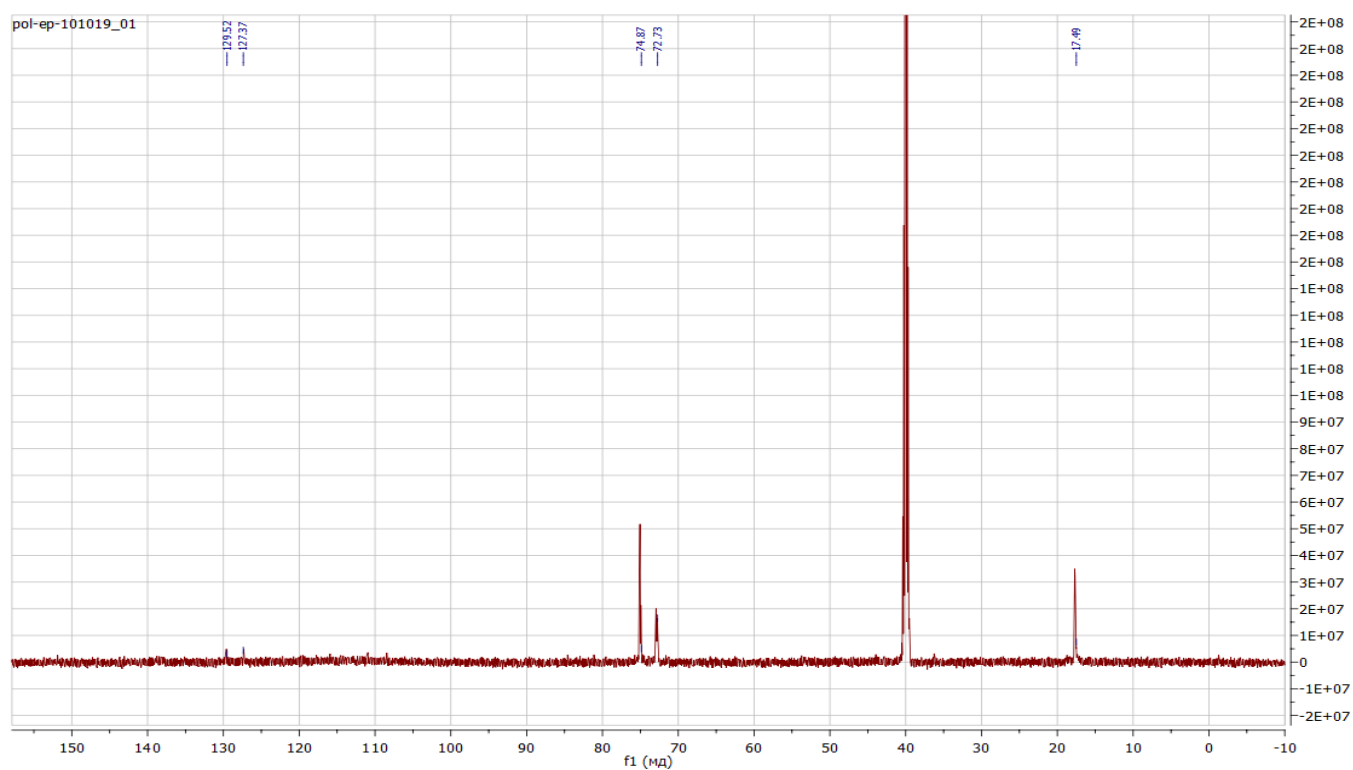Figure S4.  $^{13}\text{C}$  NMR spectrum of PU-V1.0 in  $\text{DMSO-d}_6$ .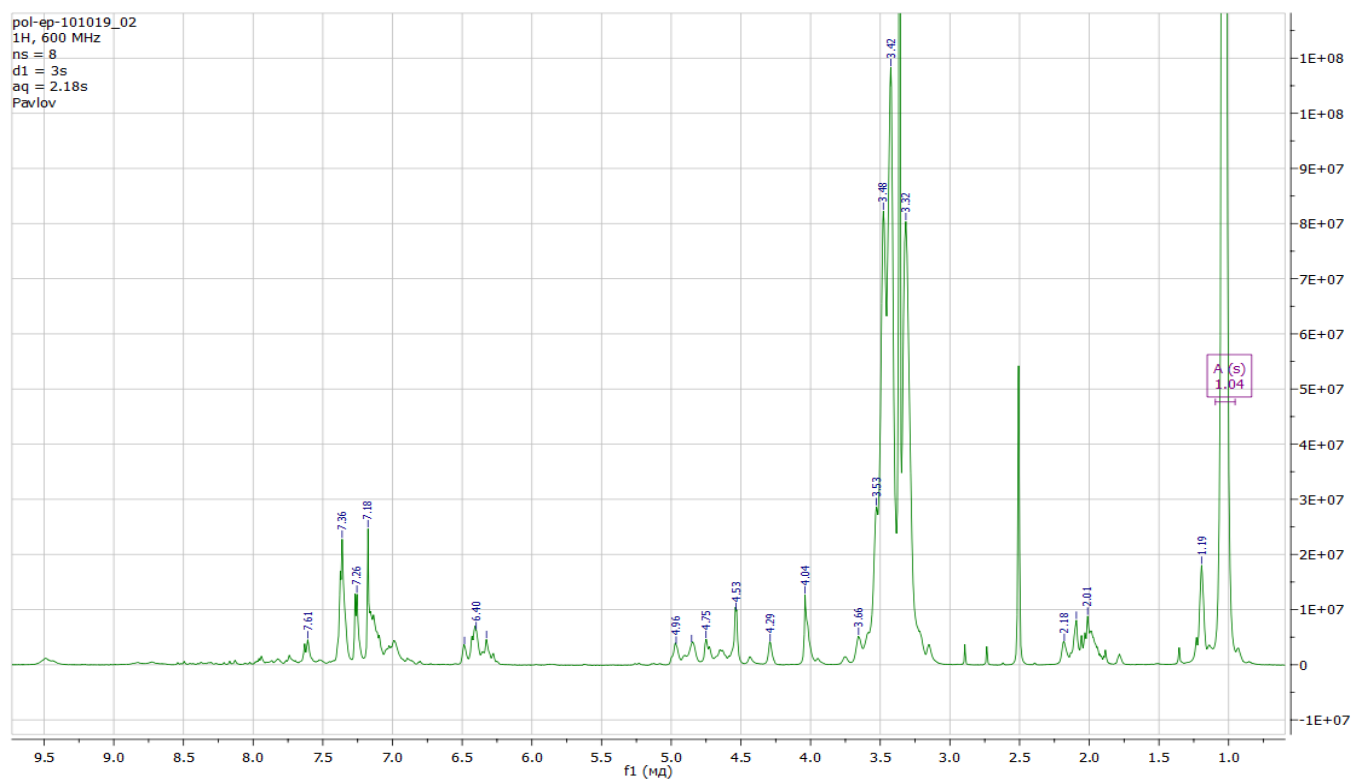Figure S5.  $^1\text{H}$  NMR spectrum of PU-V2.0 in  $\text{DMSO-d}_6$ .

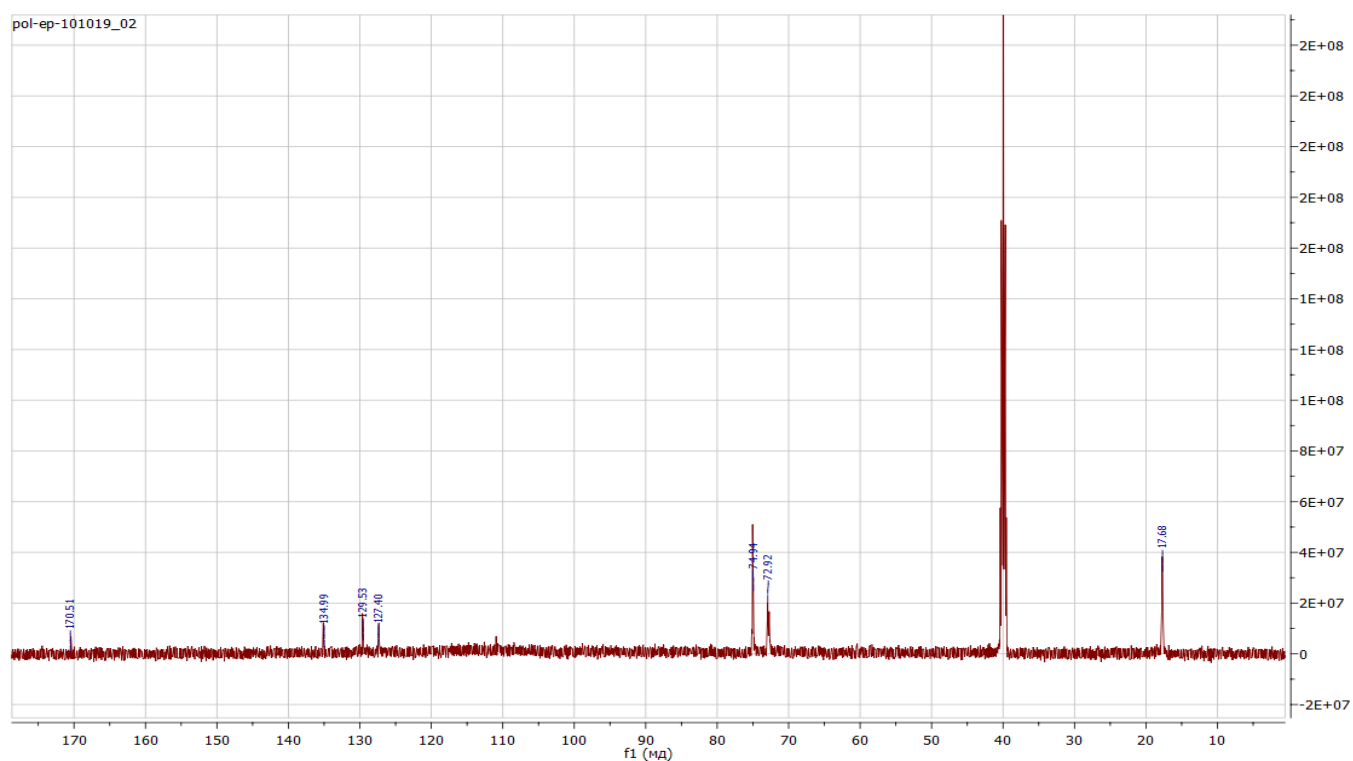

Figure S6.  $^{13}\text{C}$  NMR spectrum of PU-V2.0 in  $\text{DMSO-d}_6$ .

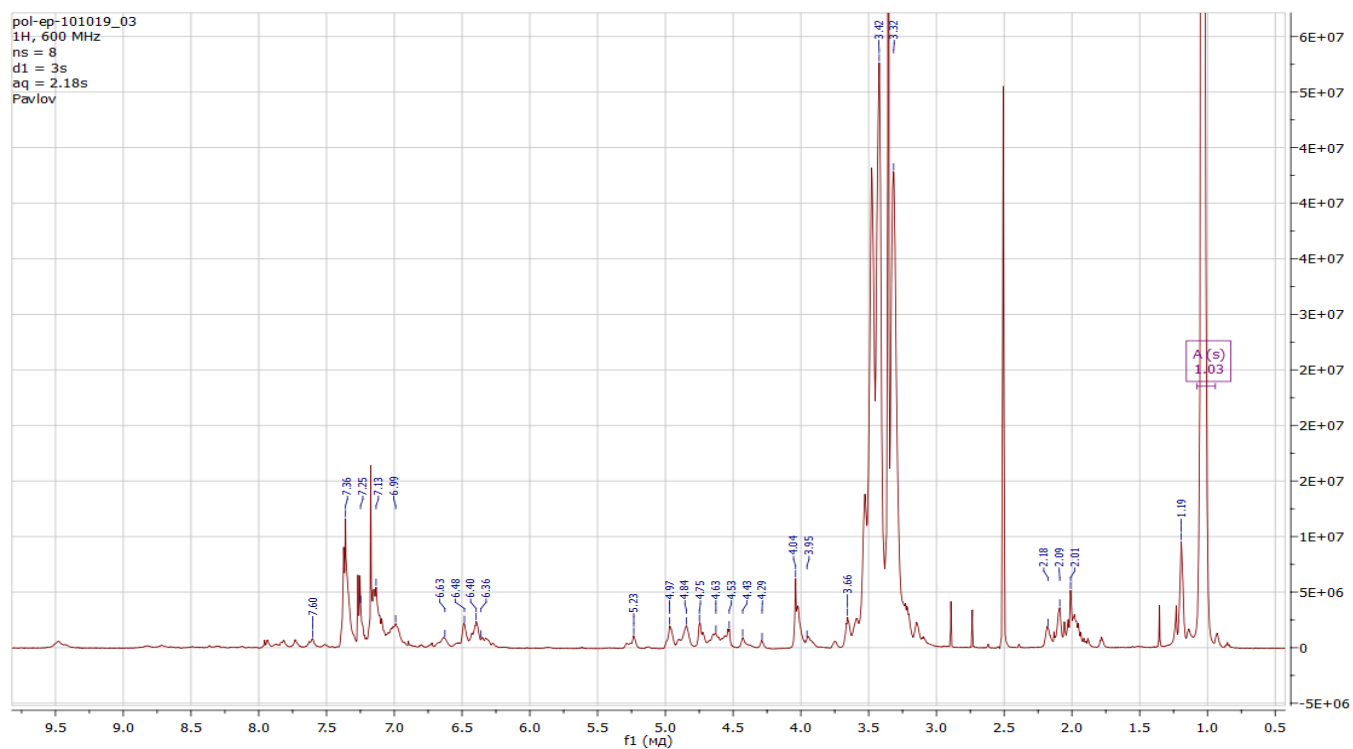

Figure S7.  $^1\text{H}$  NMR spectrum of PU-V3.0 in  $\text{DMSO-d}_6$ .

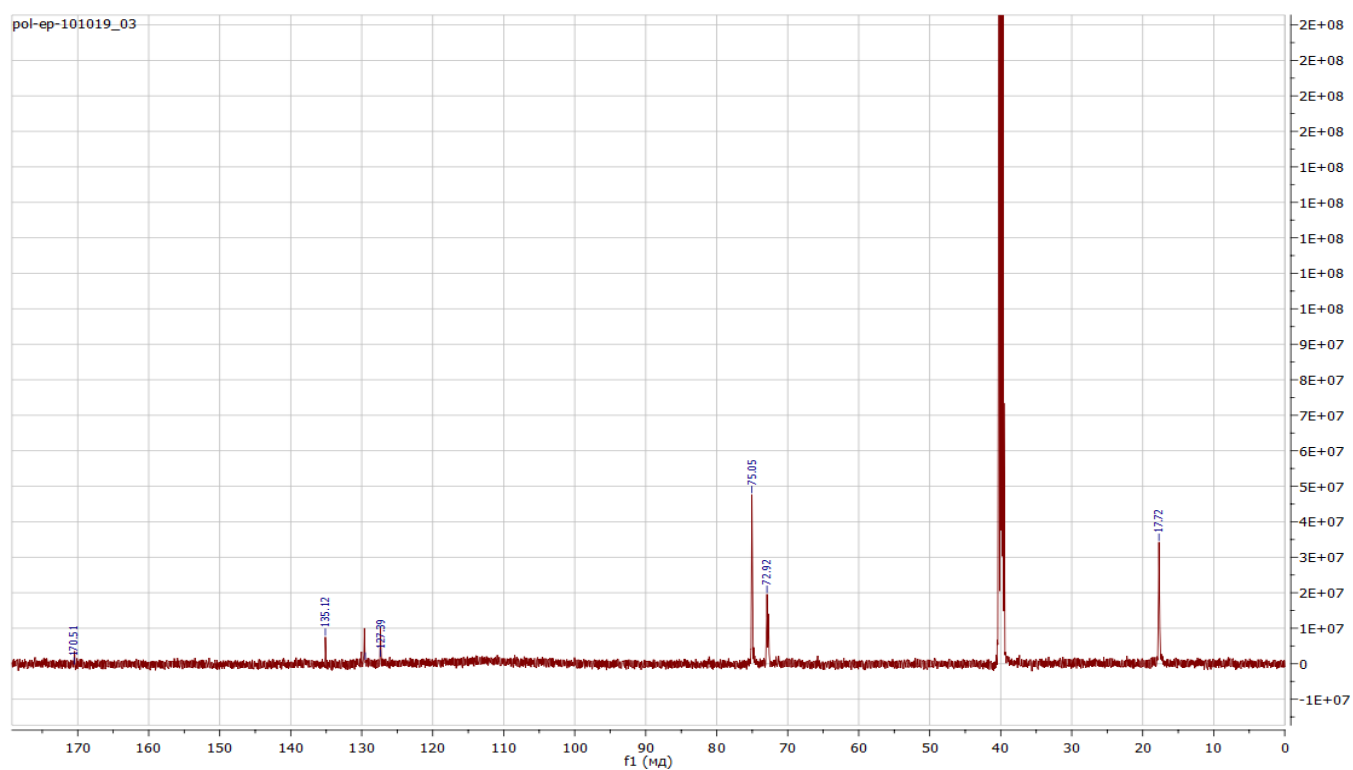

Figure S8.  $^{13}\text{C}$  NMR spectrum of PU-V3.0 in  $\text{DMSO-d}_6$ .

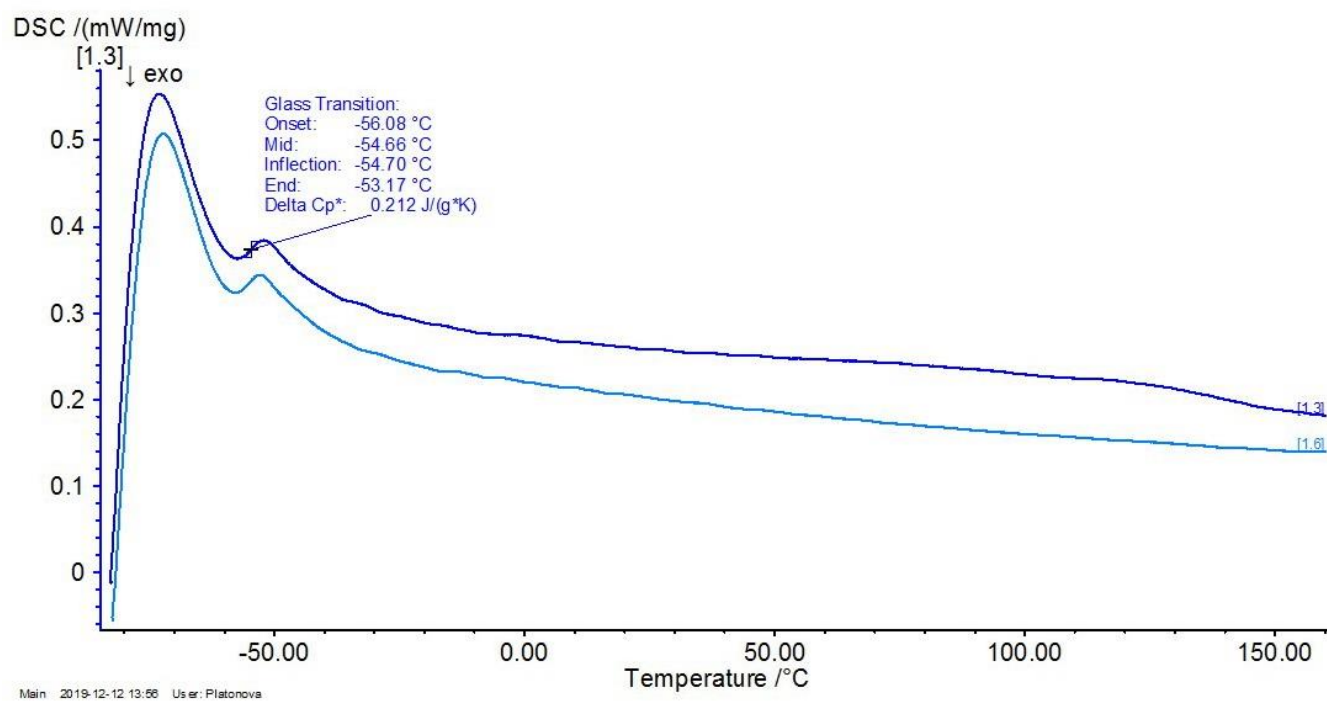

Figure S9. DSC curves for PU-V1.0 at 5 K/min.

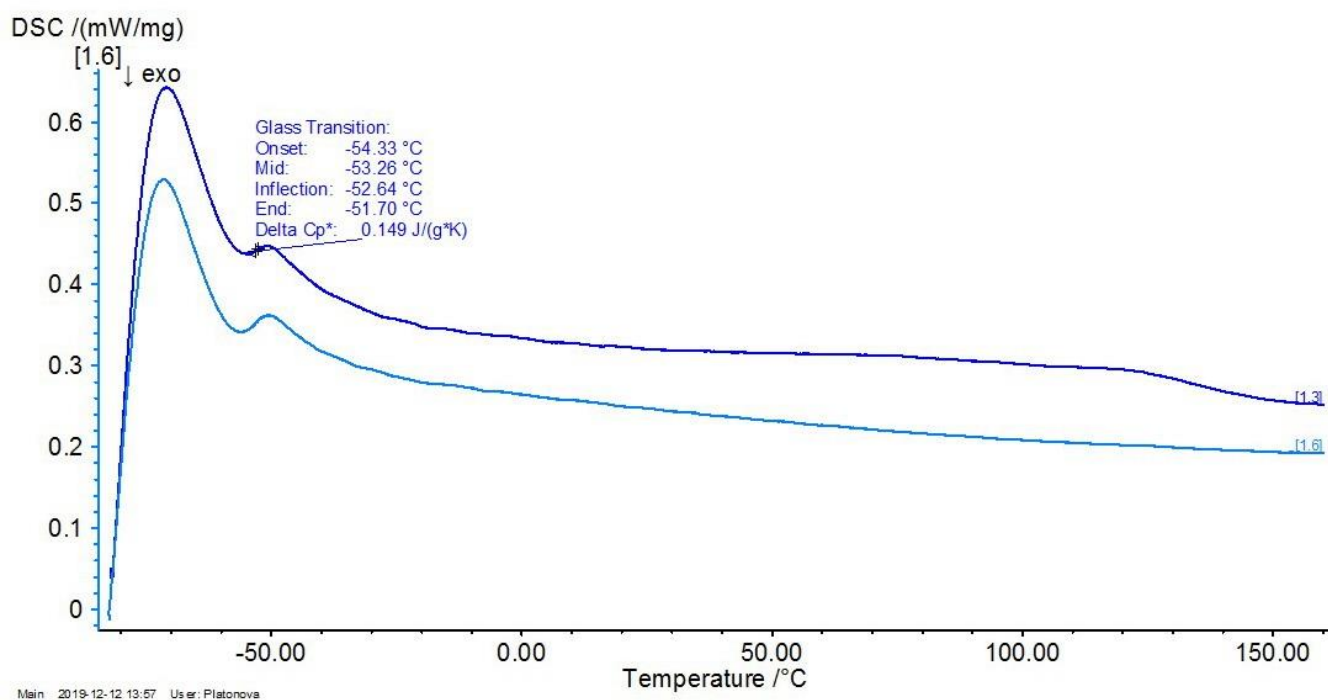

Figure S10. DSC curves for PU-V2.0 at 5 K/min.

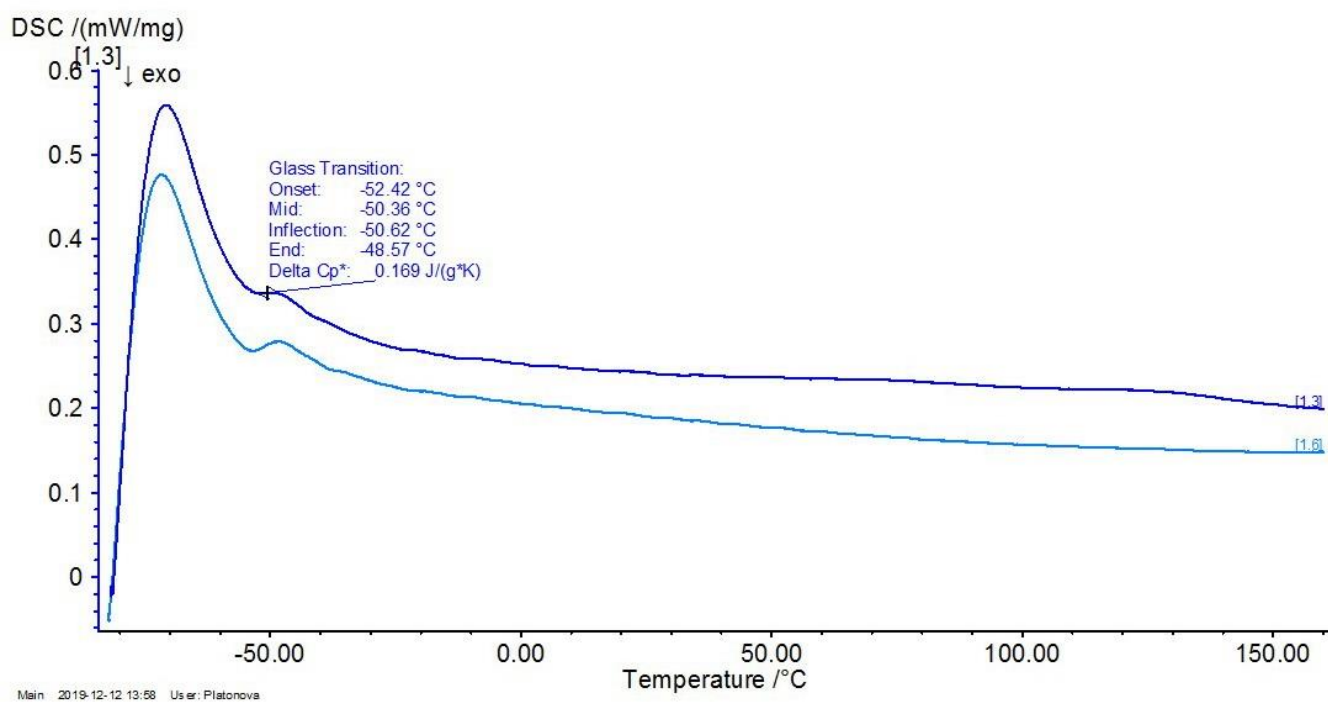

Figure S11. DSC curves for PU-V3.0 at 5 K/min.

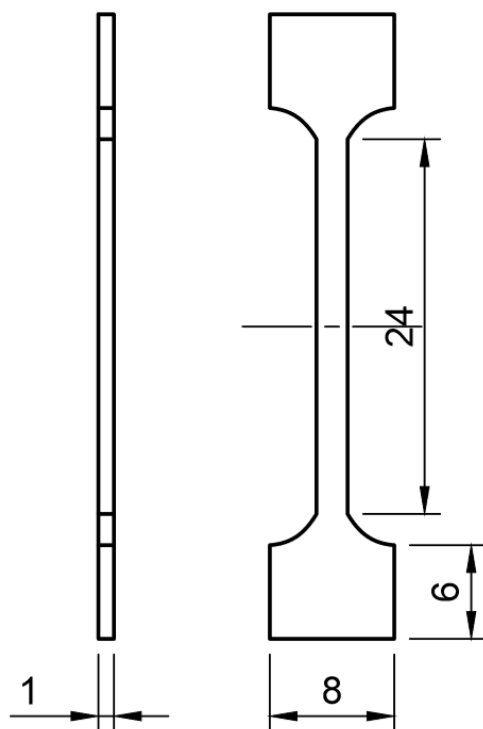

**Figure S12.** Shape of tensile strength samples of PU-L1.X-3.X (X =0-5).

Tensile tests were performed with Zwick Roell Z100. Set of test parameters are shown at Table S1.

**Table S1.** Tensile test parameters.

|                         |         |
|-------------------------|---------|
| Preload, N              | 1.2     |
| Preload speed, mm/min   | 50      |
| Test load speed, mm/min | 150/800 |

Value of preload was chosen in accordance with accuracy of the force sensor ( $\pm 1$  N) for getting rid of compressive stresses in material, which occur after installation of test samples in the clamps of tensile-machine).

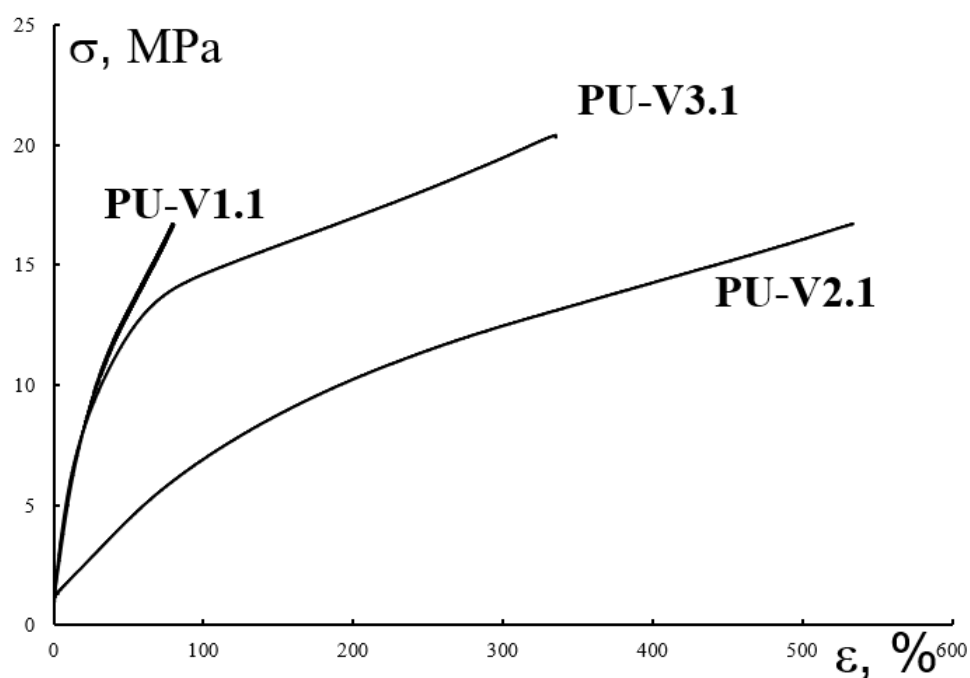

Figure S13. Loading diagrams for samples PU-V1.1-3.1.

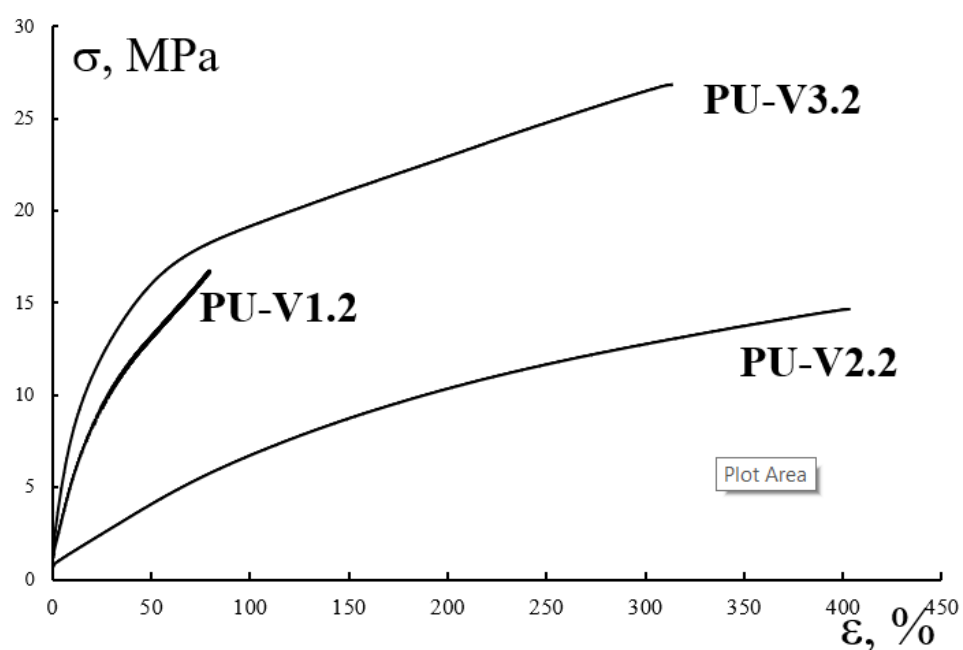

Figure S14. Loading diagrams for samples PU-V1.2-3.2.



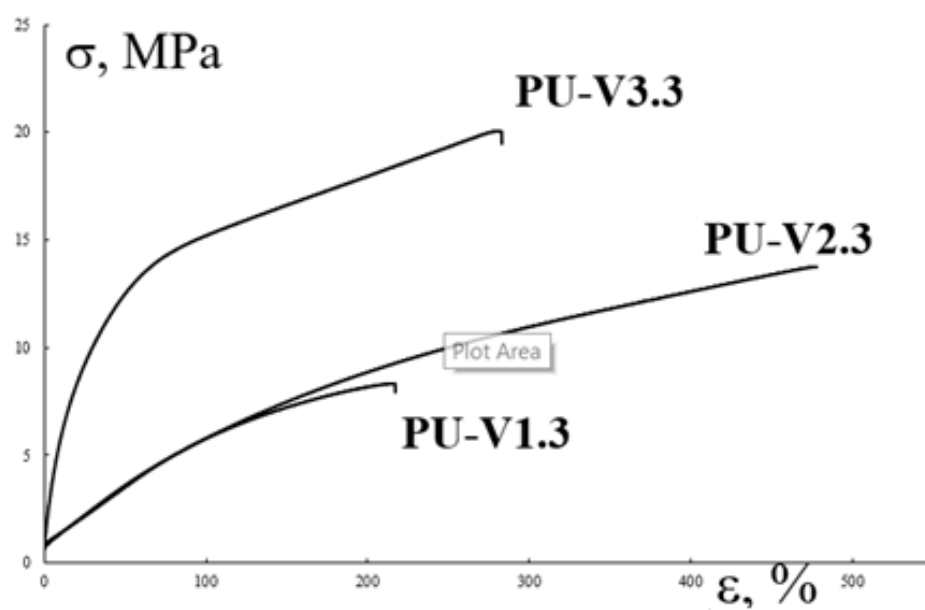

Figure S15. Loading diagrams for samples PU-V1.3-3.3.

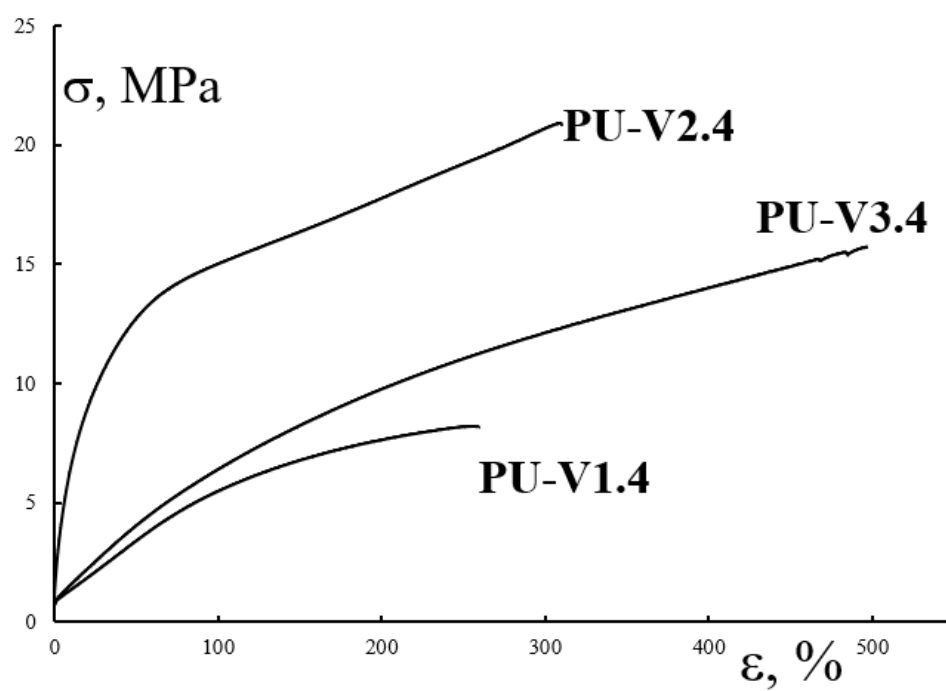

Figure S16. Loading diagrams for samples PU-V1.4-3.4.

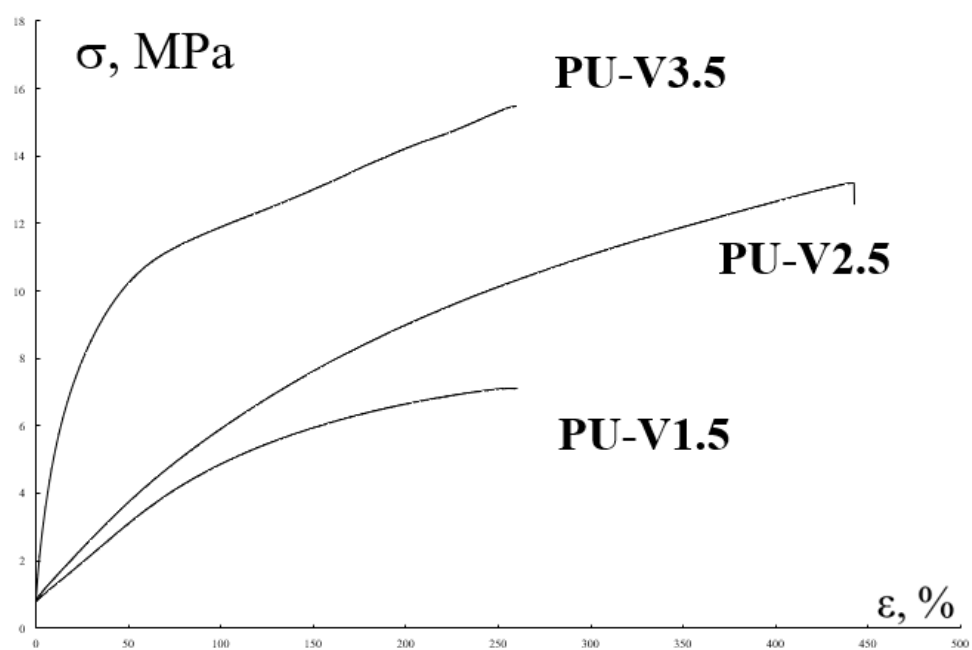

**Figure S17.** Loading diagrams for samples PU-V1.5-3.5
